# Supplementary material for: Cycloaddition of CO2to epoxides using di-nuclear transition metal complexes as catalysts
Source: Royal Society of Chemistry journal article supplement (doi:10.1039/c5nj03198b), 2016-01-01
Supplement: c5nj03198b1.pdf [file c5nj03198b1.pdf]

### SUPPLEMENTRY INFORMATION

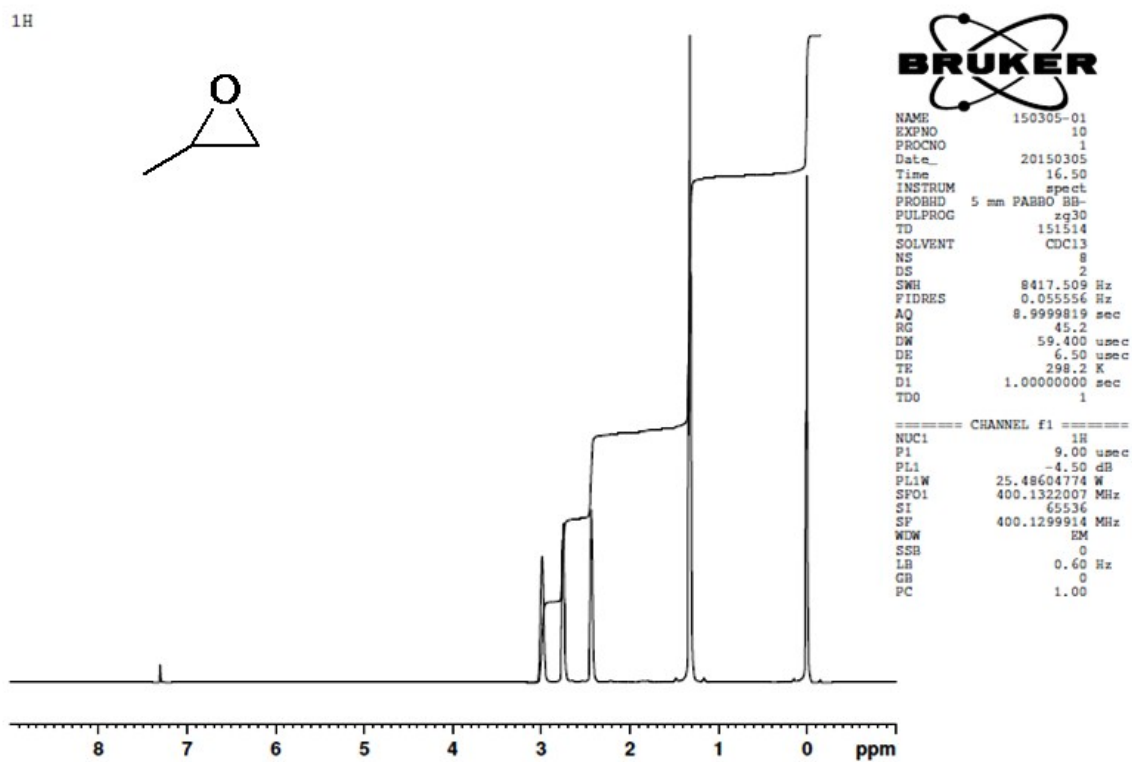

Fig. S1. <sup>1</sup>H NMR of propylene oxide (PO).

1H

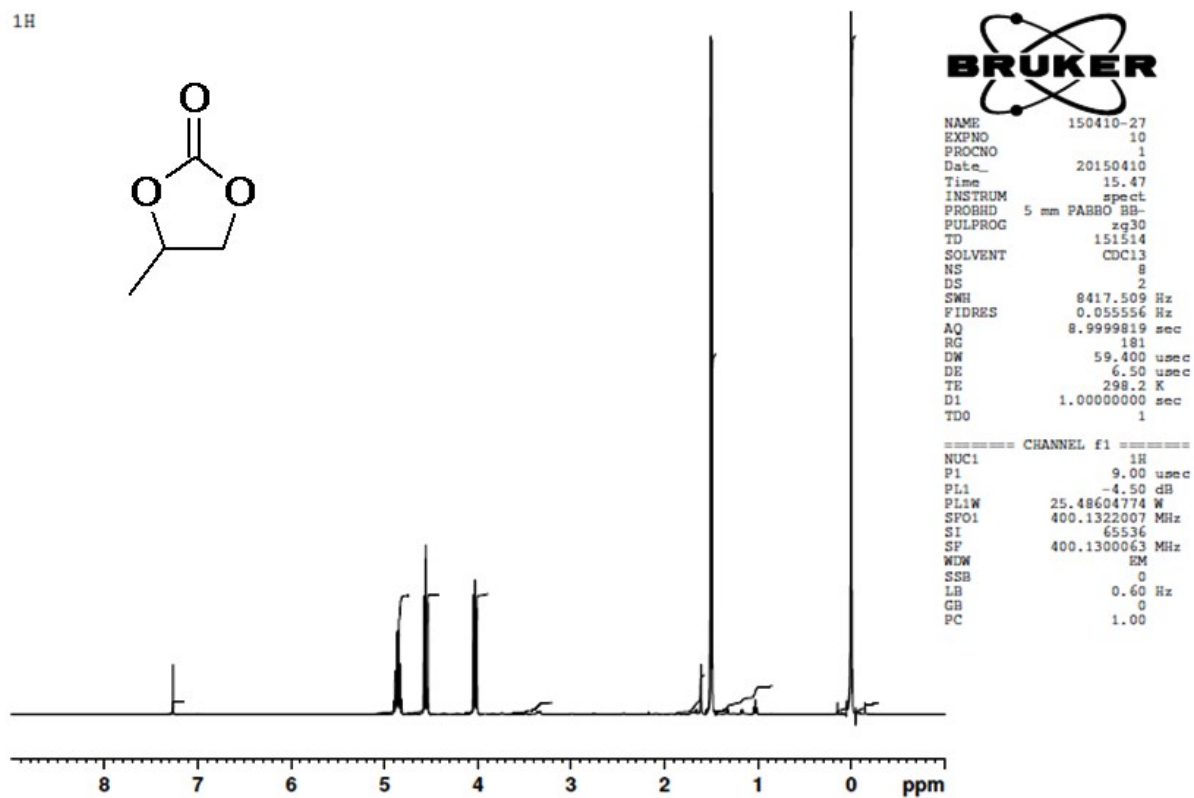

Fig. S2. <sup>1</sup>H NMR of cyclic carbonate (propylene carbonate).

13C

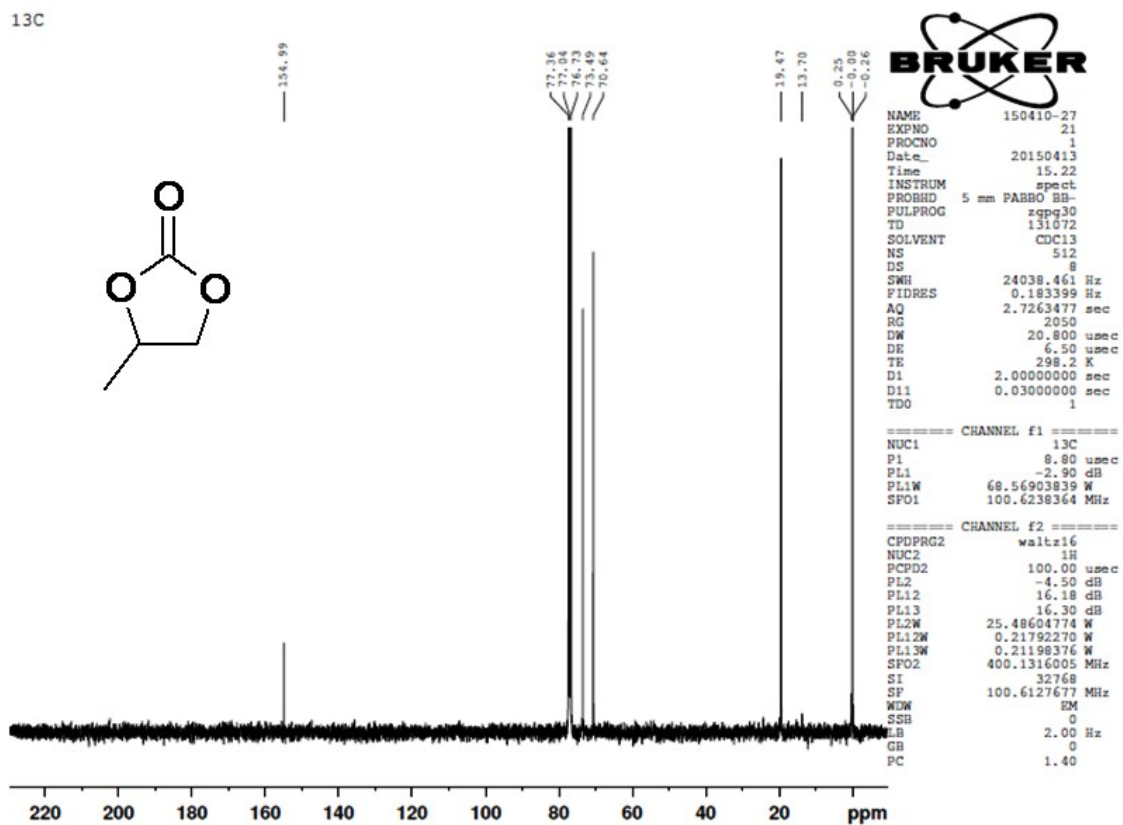

Fig. S3.  $^{13}\text{C}$ NMR of cyclic carbonate (propylene carbonate).

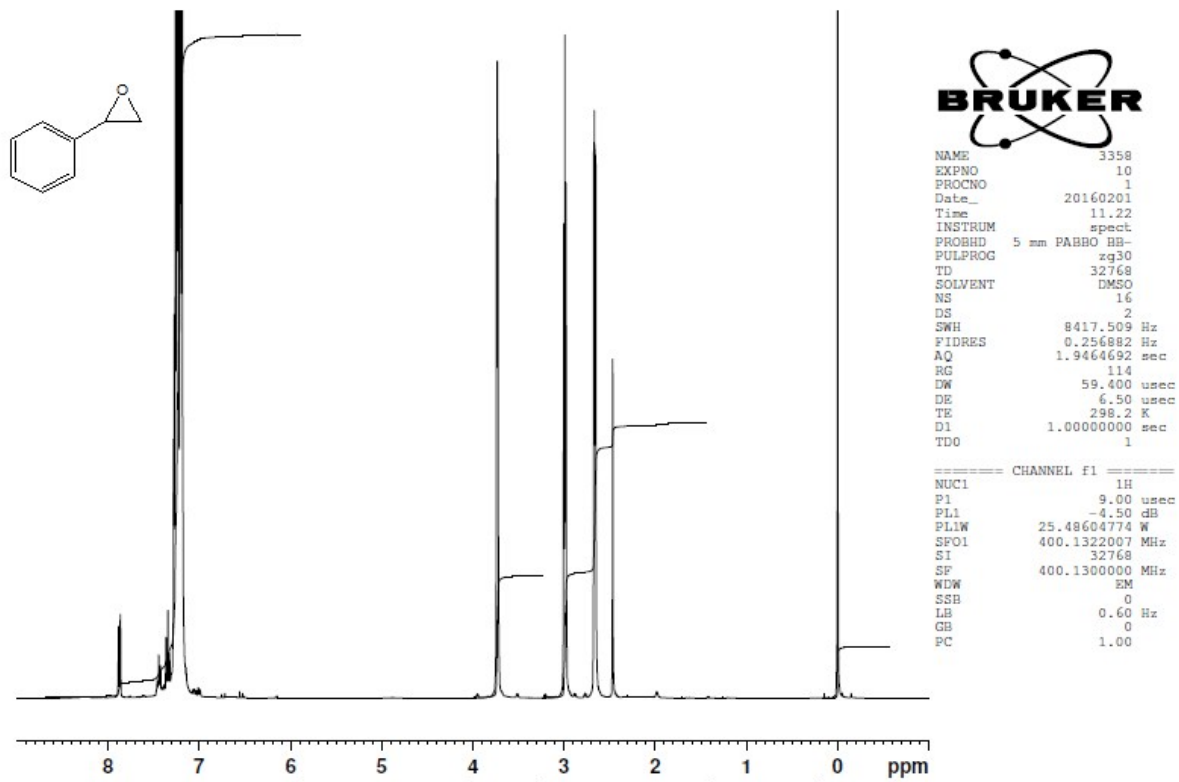

**Fig. S4.**  $^1\text{H}$ NMR of Styrene oxide

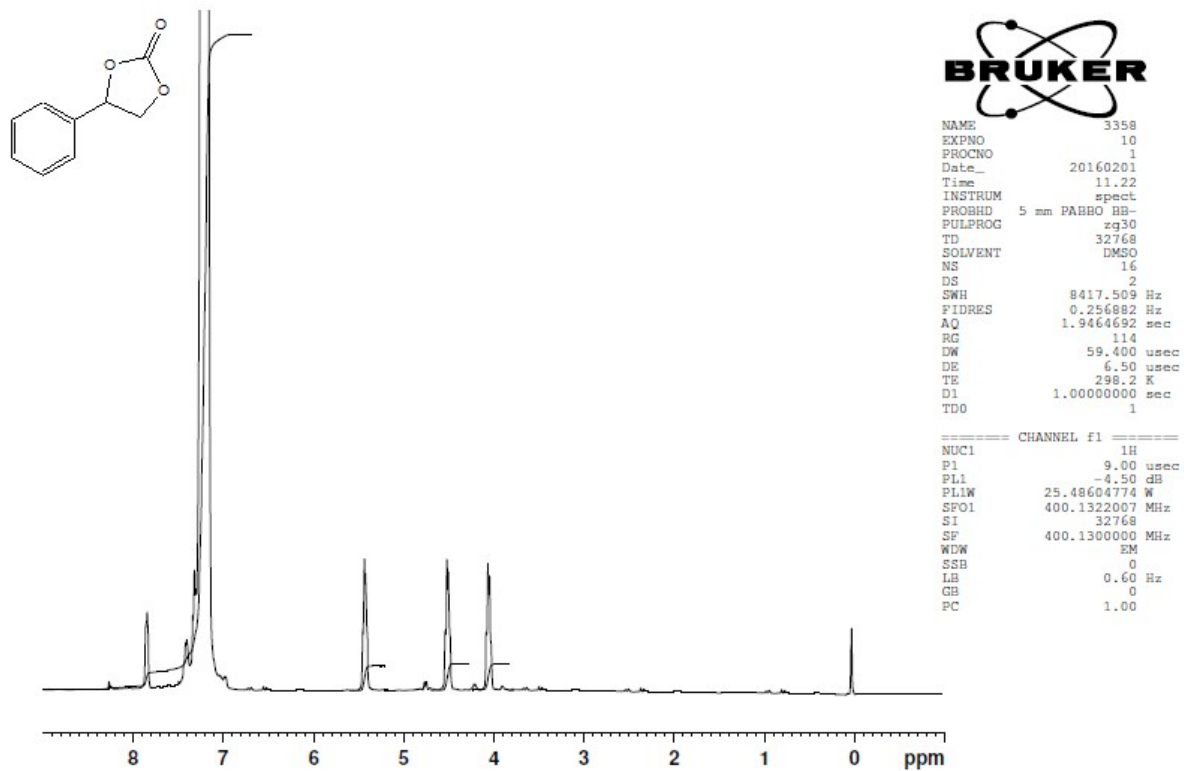

**Fig. S5.**  $^1\text{H}$ NMR of cyclic carbonate from Styrene oxide
